# Supplementary material
Source: PubMed Central journal article supplement (PMC5446626)
Supplement: JB.00874-16_zjb999094414s1.pdf [file JB.00874-16_zjb999094414s1.pdf]

Table S1. Primers used in this study

| Primer name           | Sequence (5' to 3')                                                                 |
|-----------------------|-------------------------------------------------------------------------------------|
| Cloning               |                                                                                     |
| VciB.2659.for         | AAGAGCGCTCGCCGAAACTG                                                                |
| VciB.3658.rev         | GCCAAATGGGGATCAATCGTTT                                                              |
| VciB.4337.SO.for      | ACGATTGATCCCCATTTGGCTTGACTCCCCACGCGGC                                               |
| VciB.5336.rev         | GTCACGGTTAATTGGCGAGTAA                                                              |
| VciA.596.for          | GGTGCTACTGTGCTTTCACAC                                                               |
| VciA.1596.rev         | GAAGGA TTA ACTCTATTTATTATTGACG                                                      |
| VciA.3639.SO.for      | CGTCAATAATAAATAGAGTTAATCCTTCACGATTGATCCCCATTT<br>GGCAT                              |
| VciA.4638.rev         | ACGGATTGAGAGGTAGCGCA                                                                |
| VciB.3337.EcoRI       | ATCGGAATTCCCAACGTATCGCGCCTCAAT                                                      |
| VciB.4336.rev.XbaI    | ATGCTCTAGATTAACCAAAGATAGCGAACAGTG                                                   |
| BTvciB.EcoRI.for      | GATCGAATTCTCGGAGCCTTGCGGGCGC                                                        |
| BTvciB.rev            | TCAGGTCAACCCCGCCG                                                                   |
| BMvciB.EcoRI.1578.for | GATCGAATTCAGCGGTGAGCGCCTGATG                                                        |
| BMvciB.2524.rev       | TCAGGTCAGCCCGGCCG                                                                   |
| AHvciB.EcoRI.for      | GATGGAATTCGATCGCTTCGCCGACAACG                                                       |
| AHvciB.rev            | CTAGAGCAGGGCCACCAG                                                                  |
| VciB.V5.for.EcoRI     | TTACGAATTCAGGCAAGCCCATCCCCAACCCTTGCTTGGCTTGG<br>ACTCCACC GCCGCAATGCAGCGGCAAGTCAAAGG |
| VciB.V5fix.for.EcoRV  | TATGGATATCGGCAAGCCCATCCCCAAC                                                        |
| VciB.fix.rev.EcoRV    | GGTGGATATCCATAGCTGTTTCCTGTGTGAAATT                                                  |
| Nqr.1045.for          | GGAACACCATCACGGTTCAGT                                                               |
| Nqr.2250.SO.rev       | CAATTAGCCAGTTTGAATCGCGAAAGACACGGATGCA                                               |
| Nqr.7328.for          | TCGCGATTCAA ACTGGCTAATTG                                                            |
| Nqr.8338.rev          | GCCGGCCTGCGTCCTG                                                                    |
| NapC.369.for          | GGAATATGGCAGGTTGTGAAC                                                               |
| NapC.1268.SO.rev      | GCCCAGTGCAATCAGGGTTACAAACGCACGTCTGGTCATTTT                                          |
| NapC.3731.for         | TAACCCTGATTGCACTGGGC                                                                |
| NapC.4630.rev         | GTGCGCGGCGTGCTTGG                                                                   |
| pET16b.vciB.NdeI.for  | GTACCATATGCAGCGGCAAGTCAAAGGG                                                        |
| pET16b.vciB.XhoI.rev  | GATCCTCGAGTTAACCAAAGATAGCGAACAGTG                                                   |
| H8.for                | GGAATTGTGAGCGGATAACAATTC                                                            |
| VciB.4336.rev         | TTAACCAAAGATAGCGAACAGTGT                                                            |
| SCAM mutagenesis      |                                                                                     |
| VciB.C41S.for         | GCCGCCTTCATGCATGGTCCGGCTTCTTTACCCTACTC                                              |
| VciB.C41S.rev         | GAGTAGGGTAAAGAAGCCGGACCATGCATGAAGGCCGGC                                             |
| VciB.S18C.for         | CGTTGCATAATCAAGCAGGCCGTTAGGCCAGC                                                    |
| VciB.S18C.rev         | GCTGGCCTAACGGCCTGCTTGATTATGCAACG                                                    |
| VciB.I34C.for         | TGCCGCCGCTTCATGCATG                                                                 |
| VciB.I34C.rev         | CCATTTATTGTTGTGTAGAGGCA                                                             |
| VciB.S60C.for         | AGCGCGGTGACATAACCAAAGGCCAGTGAG                                                      |
| VciB.S60C.rev         | CTCACTGGCCTTTGGTTATGTCACCGCGCT                                                      |
| VciB.S73C.for         | GCCATTCACTTTTGCAGGTGTGTGGCCCGG                                                      |

|                               |                                              |
|-------------------------------|----------------------------------------------|
| VciB.S73C.rev                 | CCGGGCCACACACCTGCAAAAGTGAATGGC               |
| VciB.S75C.for                 | CGGGCCACACACCAGCAAATGTGAATGGCAACTCTCGCTCAC   |
| VciB.S75C.rev                 | GTGAGCGAGAGTTGCCATTACATTTGCTGGTGTGTGGCCCG    |
| VciB.I106C.for                | GGCGAACATGAGTGGACGTGTGCGGAAATCGCCGCGC        |
| VciB.I106C.rev                | GCGCGGCGATTTGCGGACACGTCCACTCATGTTGCGC        |
| VciB.A110C.for                | TGCGCGCAGCAGTTGCCCA                          |
| VciB.A110C.rev                | GATTCGCGTATCGTCCACTC                         |
| VciB.S139C.for                | GTATTGGGCGCAAAAGGTATCGGTCACGCTGG             |
| VciB.S139C.rev                | CCAGCGTGACCGATACCTTTTGCGCCAATAC              |
| VciB.A160C.for                | GCAAGCGGTTAAGCACACAGGCCAGTTGGCTTTTT          |
| VciB.A160C.rev                | AAAAAGCCAACTGGGCCTGTGTGCTTAACCGCTTGC         |
| VciB.T171C.for                | TGCCAGCCAAGACCGCATCCCATTCCGCGATGC            |
| VciB.T171C.rev                | GCATCGCGGAATGGGATGCGGTCTTGGCTGGCA            |
| VciB.L181C.for                | CATGGCAACCGCCGCACAGTCGGAAAACAACACTGC         |
| VciB.L181C.rev                | GCAGTTGTTTTCCGACTGTGCGGCGGTTGCCATG           |
| VciB.S203C.for                | TCGTTTCGGGCAGCCGTGGAGTTTGGTCC                |
| VciB.S203C.rev                | GGACCAAACCTCCACGGCTGCCCGAAACGA               |
| VciB.S215C.for                | GTGTGGTTCGCGACACAGCCACCTATCAATAG             |
| VciB.S215C.rev                | CTATTGATAGGTGGCTGTGTGCGGACCACAC              |
| VciB.G225C.for                | GGCCGCTCTAGATTAACAAAAGATAGCGAACAGTG          |
| VciB.G225C.rev                | CACTGTTGCTATCTTTTGTTAATCTAGAGCGGCC           |
|                               |                                              |
| Conserved residue mutagenesis |                                              |
| VciB.H38N.for                 | AATAAATGGATCCGCCGCCTTAATGCATGGTTCGGCTTCTTTAC |
| VciB.H38N.rev                 | GTAAAGAAGCCGCACCATGCATTAAGGCGGCGGATCCATTTATT |
| VciB.H61N.for                 | AACCGCGCTGTCTGGCCA                           |
| VciB.H61N.rev                 | AGATAACCAAAGGCCAGTGAG                        |
| VciB.H166N.for                | AATCGCGGAATGGGAACGGG                         |
| VciB.H166N.rev                | CAAGCGGTTAAGCACAGCG                          |
| VciB.W33Y.for                 | CCTGCCTCTACACAACAATAAATATATCCGCCGCCTTCATGCAT |
| VciB.W33Y.rev                 | ATGCATGAAGGCGGCGGATATATTTATTGTTGTGTAGAGGCAGG |
| VciB.W127Y.for                | ATGAAGCGCGGCCACCAG                           |
| VciB.W127Y.rev                | AGCGGGCTGGGATCAATAAC                         |
| VciB.W197Y.for                | CCCTGACCAGTTTACTGATGTATAACAACTCCACGGCTCCC    |
| VciB.W197Y.rev                | GGGAGCCGTGGAGTTTGGTATACATCAGTAACTGGTCAGGG    |
| VciB.Y142W.for                | CGATACCTTTAGCGCCCAATGGGTGCCCGGTACCTTAGTCA    |
| VciB.Y142W.rev                | TGACTAAGGTACCGGGCACCCATTGGGCGCTAAAGGTATCG    |
| VciB.D180N.for                | AACCTTGCGGCGGTTGCC                           |
| VciB.D180N.rev                | GGAAAACAACCTGCCAGCCAAG                       |

# A

```

V.cholerae          -----MQ-----RQVKGDNHRRAGLTASLIMQRRRRLPLHNNKWIRRLHA
A.hydrophila       -----MKHRAMKRRKLPPLHNNKWVRRIRHA
M.tundripaludum    -----MLQTQNPEAPLNKRKSKRIQWLKWLRRIRHA
H.massiliense      -----MNLTRQ---DALY---PERETMPAERAADNKRSRRAIFLKWLRRKMHG
B.thailandensis    MFCANGSRSVNAPESIEKHSGVVLPYPG-PPRKLDESELAERRRRSRRAFIFKWLRRKRVHG
B.mallei           MFCANGSRSVNAPESIEKHSGVVVYPYG-SPRKLDAFELAERRRRSRRAFIFKWLRRKRVHG
                                   ...      **:*:*:.

V.cholerae          WCGFFTTTTLLMLLYGLTGLWLSHRAV-WPLPGPHTSKSEWQLSLTEPIDSVSTFQAQLNT
A.hydrophila       WAGFATLTLMLLYGLTGLWLQHRAV-LPLPGPHTDKSSEIIVLSAPLTS-PDELKSLLOQ
M.tundripaludum    WVGLWGAALGLLFGVSGIILNHRMV-MKI PAVQMEQSHIEMALPQLPVDKALALWLQV
H.massiliense      WIGLWGAVLGLLFGSTGVLLNHRMV-MKI PAAHAQESTLQLPLPDPADATEMVEWLQR
B.thailandensis    WIGLWGAVLGLLFGVTGVLLNHRAPPLKISSGEPQVSQLQLALPSPAPATPHAMAAILRR
B.mallei           WVGLWGAALGLLFGVTGVLLNHRAPPLKISSGEPQVSQLQLALPSPAPATPHAMAAILRR
* * : * * * : * * : * * * : . . . * : * * : : .

V.cholerae          EYGE--HEWTIREIAAQQLPTPQQPLLI PARWEARATSVTDTFSAQYVPGTLVIQAQHOK
A.hydrophila       RYAAGFEGRVQLTPPQTLPTPDGPLTLPARWEMRGVTLQSVAASVAGTLLVTRTELQQ
M.tundripaludum    QLSIDREASKISIDPEKTVTWADRNLQPSQWRVDFHSPQQSVTAEYVWNTYVSIKRQD
H.massiliense      ELGFDPRPASRVRSEPARPVAWGDKSLKQPARWSAMFSSARMNAQVEYVWGNFVSVKRSD
B.thailandensis    ELAFDGRGLGRVTKDSAQPVAWGDRRVEQPEHWQFGLFGPSRNVQVEYWKNGYVSVKRTD
B.mallei           ELAFDGRGLGRVRKEPAQPVAWGRRVEQPEHWQFGLFGPSRNVQVEYWKNGYVSVKRTD
. . : : : * * : . . * * . : .

V.cholerae          ANWAAVLNRLHRGMGTGLGWQLFSDLAAVAMLLLALTSLLMWTKLHGSPKRAGWLLIGGS
A.hydrophila       ANFAASLNRLHRGMGTGLPWQLVGDLAALAMLLLALTSLLMWNKLHGPAARGIALLLLGA
M.tundripaludum    ANAFAFITRLHKGVMGTAWVLLADTLAGGLVFLSLTGLLLWTKLHGSRAMAGLGLTSL
H.massiliense      NNVFATLNNLHKGVMGSI AWILLVDTLAGSI ILLSITGVLLWAMMNRRLMGLAGIGFAGL
B.thailandensis    NAFLTTLNLRHGVMNLFVLLMDTIAGSMVLLSLTGVLWTELNRKRTVGVILVAGSV
B.mallei           NAFLTALNLRHGVMNLFVLLMDTIAGSMVLLSLTGVLWTELNRKRTVGVVILVAGSV
: . . * * : * * . * * * * . : : : * * : : .

V.cholerae          VATTLF AIFG-
A.hydrophila       LVTVLVALL--
M.tundripaludum    GSMVFITLNSL
H.massiliense      AATVILAMQAM
B.thailandensis    AAALAAGLT--
B.mallei           AAALAAGLT--

```

# B

Aeromonas hydrophila BG-2 coding region

```

ATGAAGCACCAGCGATGAAACGCAGAAAACCTCCCCCTGCACAACAACAAGTGGGTGCGCCGCATCCACGCCTGGG
CCGGCTTTGCCACCCCTACCCCTGATGCTGCTCTACGGCCTCACCAGCCTCTGGCTGCAACACAGGGCCGTGCTGCC
GCTGCCCCGCCCCACACCATAAATCCAGCGAAGAGATAGTGCTGAGCGCGCCGCTGACCAGCCCCGATGAGCTG
AAAAGCCTGCTGCAACAACGCTATGCAGCAGGGTTCGAGGAGGGGCGCGTCCAGCTCACCCCGCCCCAGACCCTGC
CCACCCCGACGGCCCGCTCACCCCTGCCGGCCCCGCTGGGAGATGCGCGGCGTACCCTCAGCCAGAGCGTGGCCGC
CAGCTATGTGGCGGGCACATTGCTGGTGCACCGAGCTGCAGCAAGCAACTTTGCCGCCAGCCTCAACCGGCTG
CACCGTGGCATGGGCACCGCCTGCCGTGGCAGCTGGTGGGGGATCTGGCGGCGTGGCCATGCTGCTGCTGGCCC
TCACCAGCCTGCTGATGTGGAACAAGCTGCACGGCCCCGCGCGTGGCATCGCTCTGCTGCTGCTGGCGCCCT
GGTCAACCGTCTGGTGGCCCTGCTCTAG

```

**Figure S1. Sequence alignment for tested orthologs and *A. hydrophila* isolate BG-2 coding sequence.** (A) Alignment of protein sequences was performed using Clustal Omega (43). *Vibrio cholerae*, *Aeromonas hydrophila*, *Methylobacter tundripaludum*, *Herbaspirillum massiliense*, *Burkholderia thailandensis*, and *Burkholderia mallei* are shown. Arrows indicate residues targeted for mutagenesis, Red arrows indicate essential residues (His38 and His166 in *V. cholerae*). (B) The *vciB* locus of the *Aeromonas hydrophila* isolate BG-2 obtained from the Texas Department of Health was sequenced after cloning.

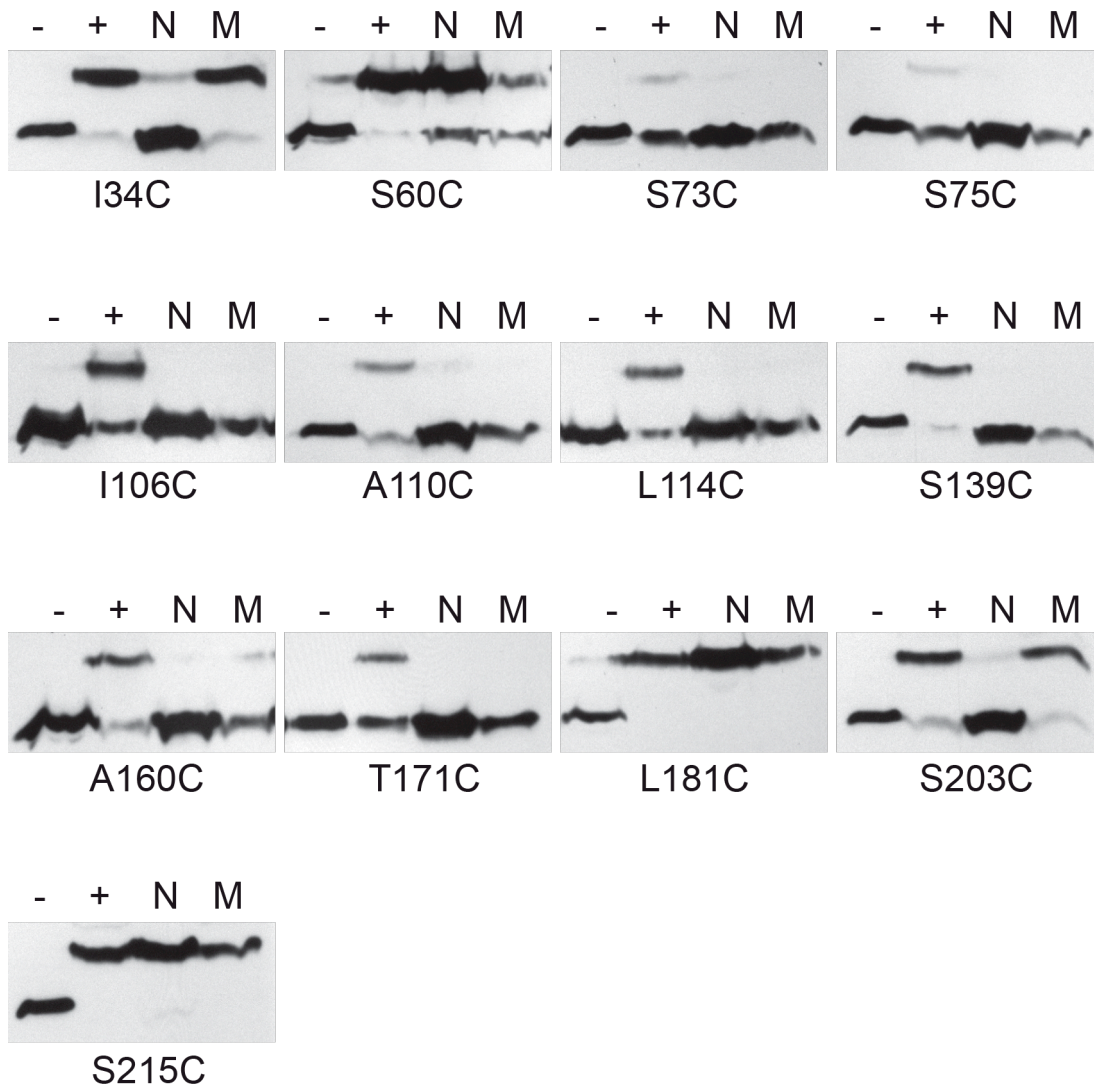

**Figure S2. Panel of SCAM Cys mutants.** Mutants generated in the V5-tagged, Cys-less (C41S) background were tested for Cysteine accessibility to the solvent using NEM and MTSES reagents. Subsequent treatment with MalPEG was used to visualize initial blocking by NEM and MTSES. – indicates the no treatment negative control, + indicates the MalPEG treated positive control, N indicates samples pretreated with NEM and M indicates samples pretreated with MTSES.
